# Supplementary material for: Comprehensive identification and expression analyses of the SnRK gene family in Casuarina equisetifolia in response to salt stress
Source: BMC Plant Biol. 2022 Dec 9;22:572. doi: 10.1186/s12870-022-03961-7 (PMC9733041; doi:10.1186/s12870-022-03961-7)
Supplement: Supplementary file 7 — Additional file 7: Table S1 Details of the identified CeqSnRK genes. Table S2. The prediction of subcellularlocalization. Table S3. Details of SnRKgenes from Arabidopsis, rice, grapevine, and Populous trichocarpa.Table S4. Detailed information for the 20 motifs in the SnRK proteins of Casuarina equisetifolia. Table S5. Ka/Ks ratios of paralogous andorthologous gene pairs. Table S6. Promoteranalysis of the CeqSnRK genes. TableS7. Promoter analysis of the CeqSnRK genes. Table S8. List of primer sequences used for RT-qPCRanalysis of the CeqSnRK genes. [file 12870_2022_3961_MOESM7_ESM.xlsx]

## Sheet: Table S1
Table S1. Details of the identified CeqSnRK genes.
Name	Gene Identifier	Location	ORF length (bp)	Protein			Exons
				Length (a.a.)	PI	Mol.Wt. (Da)
CeqSnRK1.1	CCG002716.1	scaffold_125:286302..290691(+)	1536	511	8.51	58568.9	10
CeqSnRK1.2	CCG002717.1	scaffold_125:291366..300053(+)	1575	524	8.9	60301	10
CeqSnRK2.1	CCG000136.2	scaffold_1:1430674..1433825(+)	936	311	4.86	35329.1	7
CeqSnRK2.2	CCG001996.1	scaffold_119:195625..199837(+)	831	276	6.42	31435.8	6
CeqSnRK2.3	CCG005422.1	scaffold_16:416114..419238(-)	1023	340	5.47	38421.8	9
CeqSnRK2.4	CCG016236.1	scaffold_37:1120253..1123647(+)	744	247	4.43	27713.4	6
CeqSnRK2.5	CCG018834.1	scaffold_44:1282809..1289449(+)	993	330	5.77	37778.8	8
CeqSnRK2.6	CCG023215.2	scaffold_63:96510..99373(+)	1023	340	5.85	38169.4	9
CeqSnRK2.7	CCG027497.1	scaffold_84:1215697..1217955(+)	786	261	5.37	29331.5	6
CeqSnRK3.1	CCG003917.1	scaffold_14:605620..607767(+)	1305	434	9.07	49414.8	1
CeqSnRK3.2	CCG003921.1	scaffold_14:623400..639985(-)	1143	380	5.15	42531.4	4
CeqSnRK3.3	CCG003922.1	scaffold_14:654163..655544(-)	1290	429	9.21	48853.3	2
CeqSnRK3.4	CCG004827.1	scaffold_150:311766..314628(-)	1338	445	8.85	50291.1	1
CeqSnRK3.5	CCG004999.1	scaffold_152:167398..169202(-)	1314	437	9.15	48394.7	1
CeqSnRK3.6	CCG007081.1	scaffold_18:2254904..2257228(+)	1458	485	6.52	54441.4	1
CeqSnRK3.7	CCG009613.3	scaffold_218:163562..171588(+)	1626	541	8.44	61476.1	16
CeqSnRK3.8	CCG010914.1	scaffold_24:1639122..1641084(+)	1362	453	9.18	51221.2	1
CeqSnRK3.9	CCG016009.1	scaffold_36:1499591..1501645(+)	1302	433	9.04	48729.2	1
CeqSnRK3.10	CCG021168.1	scaffold_53:621382..623192(+)	1353	450	9.12	50917.9	1
CeqSnRK3.11	CCG021635.1	scaffold_55:248194..255063(+)	1371	456	9.02	51046.8	15
CeqSnRK3.12	CCG023761.2	scaffold_65:1272677..1277259(-)	1536	511	8.98	57488.9	12
CeqSnRK3.13	CCG023938.1	scaffold_65:2723484..2729554(-)	1071	356	5.85	40395.3	12
CeqSnRK3.14	CCG024763.2	scaffold_7:294401..297148(+)	1395	464	9.11	52636.8	1
CeqSnRK3.15	CCG024767.1	scaffold_7:347128..349160(-)	1323	440	8.6	49760.3	1
CeqSnRK3.16	CCG027242.2	scaffold_83:839114..844005(+)	1281	426	8.03	48145.4	14
CeqSnRK3.17	CCG027906.1	scaffold_87:156472..161316(+)	1290	429	8.54	48625.1	13

## Sheet: Table S2
Table S2. The prediction of subcellular localization in CeqSnRK deduced proteins.
Gene		Nuclear	Chloroplast	Cytoskeletal	Cytoplasmic	Nuclear and Cytoskeletal	Nuclear and cytoplasmic	Golgi apparatus	plasma membrane	Cytoplasmic and plasma membrane	Mitochondrial	Mitochondrial and plasma membrane	Vacuolar	Peroxisomes	Endoplasmic reticulum	Endoplasmic reticulum and plasma membrane	Endoplasmic reticulum and vacuolar	Extracellular
CeqSnRK1.1		5	1		6				1				1
CeqSnRK1.2		3	2		4			1	1		1		1	1
CeqSnRK2.1		2		6	5				1			1
CeqSnRK2.2				14
CeqSnRK2.3		2			9			1			1			1
CeqSnRK2.4		6	3	1	2						1				1			1
CeqSnRK2.5				13				1
CeqSnRK2.6		1		10	2				1
CeqSnRK2.7		7			5			1										1
CeqSnRK3.1		2	2	3	7
CeqSnRK3.2		1	2		3				2		1		1		4
CeqSnRK3.3		2.5	4		2	2			2		1		1					1
CeqSnRK3.4		1	11								1				1			1
CeqSnRK3.5		1	11								1							1
CeqSnRK3.6		2	4		2				2				1		3
CeqSnRK3.7		1.5	4			1.5		1	2		2		1		2
CeqSnRK3.8		2			6			1	1.5		1		1		1.5	2
CeqSnRK3.9								1	6.5	4					4
CeqSnRK3.10		1	1		7								1		4
CeqSnRK3.11			8					1			1				1
CeqSnRK3.12		1	10		2				1
CeqSnRK3.13			1		1.5		1.5		6		1		1		3
CeqSnRK3.14		2.5	4		2	2			2		1		2
CeqSnRK3.15		1	1	4	6												1	1
CeqSnRK3.16								1	7.5	4.5	1		1		3
CeqSnRK3.17			3		2	1			2		2		1		3

## Sheet: Table S3
Table S3. Details of SnRK genes from rice, Arabidopsis, Populous trichocarpa and Eucalyptus grandis.
Name	Gene Identifier	Name	Gene Identifier	Name	Gene Identifier	Name	Gene Identifier
OsOSK1	Os05g0530500	AtSnRK1.1	At3g01090	PtSnRK1.1	Potri.004G115900.1	EgrSnRK1.1	Eucgr.B00544.1
OsOSK2	Os07g0194100	AtSnRK1.2	At3g29160	PtSnRK1.2	Potri.017G087900.1	EgrSnRK1.2	Eucgr.J01364.3
OsOSK3	Os03g0289100	AtSnRK1.3	At5g39440	PtSnRK2.1	Potri.T011000	EgrSnRK2.1	Eucgr.D02135.1
OsOSK4	Os08g0484600	AtSnRK2.1	At5g08590	PtSnRK2.2	Potri.004G21820	EgrSnRK2.2	Eucgr.E00345.1
OsSAPK1	Os03g0390200	AtSnRK2.2	At3g50500	PtSnRK2.3	Potri.004G138300	EgrSnRK2.3	Eucgr.G00557.1
OsSAPK2	Os07g0622000	AtSnRK2.3	At5g66880	PtSnRK2.4	Potri.003G015400	EgrSnRK2.4	Eucgr.G00558.1
OsSAPK3	Os10g0564500	AtSnRK2.4	At1g10940	PtSnRK2.5	Potri.005G072600	EgrSnRK2.5	Eucgr.H04745.1
OsSAPK4	Os01g0869900	AtSnRK2.5	At5g63650	PtSnRK2.6	Potri.002G099700	EgrSnRK2.6	Eucgr.I00977.1
OsSAPK5	Os04g0691100	AtSnRK2.6	At4g33950	PtSnRK2.7	Potri.005G162500	EgrSnRK2.7	Eucgr.I01180.1
OsSAPK6	Os02g0551100	AtSnRK2.7	At4g40010	PtSnRK2.8	Potri.003G084100	EgrSnRK2.8	Eucgr.I02742.1
OsSAPK7	Os04g0432000	AtSnRK2.8	At1g78290	PtSnRK2.9	Potri.007G096400	EgrSnRK3.1	Eucgr.A00690.1
OsSAPK8	Os03g0764800	AtSnRK2.9	At2g23030	PtSnRK2.10	Potri.005G134400	EgrSnRK3.2	Eucgr.A00691.1
OsSAPK9	Os12g0586100	AtSnRK2.10	At1g60940	PtSnRK2.11	Potri.009G106900	EgrSnRK3.3	Eucgr.A00711.1
OsSAPK10	Os03g0610900	AtCIPK1	At3g17510	PtSnRK2.12	Potri.004G145500	EgrSnRK3.4	Eucgr.A00734.1
OsCIPK1	Os01g0292200	AtCIPK2	At5g07070	PtCIPK1	Potri.010G002500	EgrSnRK3.5	Eucgr.A00737.1
OsCIPK2	Os07g0678600	AtCIPK3	At2g26980	PtCIPK2	Potri.019G127500	EgrSnRK3.6	Eucgr.B03773.1
OsCIPK3	Os07g0687000	AtCIPK4	At4g14580	PtCIPK3	Potri.001G222600.2	EgrSnRK3.7	Eucgr.B03958.1
OsCIPK4	Os12g0603700	AtCIPK5	At5g10930	PtCIPK4	Potri.009G021000.2	EgrSnRK3.8	Eucgr.B04021.1
OsCIPK5	Os01g0206700	AtCIPK6	At4g30960	PtCIPK5	Potri.008G160200.2	EgrSnRK3.9	Eucgr.C00193.1
OsCIPK6	Os08g0441100	AtCIPK7	At3g23000	PtCIPK6	Potri.006G263500.1	EgrSnRK3.10	Eucgr.C00357.1
OsCIPK7	Os03g0634400	AtCIPK8	At4g24400	PtCIPK7/8	Potri.018G108500.1	EgrSnRK3.11	Eucgr.C01333.1
OsCIPK8	Os01g0536000	AtCIPK9	At1g01140	PtCIPK9	Potri.006G186200.1	EgrSnRK3.12	Eucgr.C01944.1
OsCIPK9	Os03g0126800	AtCIPK10	At5g58380	PtCIPK10	Potri.010G079000.1	EgrSnRK3.13	Eucgr.C02590.1
OsCIPK10	Os03g0339900	AtCIPK11	At2g30360	PtCIPK11	Potri.011G067500.1	EgrSnRK3.14	Eucgr.C04226.1
OsCIPK11	Os01g0824600	AtCIPK12	At4g18700	PtCIPK12	Potri.002G177900.1	EgrSnRK3.15	Eucgr.D00272.1
OsCIPK12	Os01g0759400	AtCIPK13	At2g34180	PtCIPK13	Potri.014G104200.1	EgrSnRK3.16	Eucgr.D00481.1
OsCIPK13	Os01g0206300	AtCIPK14	At5g01820	PtCIPK14	Potri.013G156000.1	EgrSnRK3.17	Eucgr.E00017.1
OsCIPK14	Os12g0113500	AtCIPK15	At5g01810	PtCIPK15	Potri.019G128100.1	EgrSnRK3.18	Eucgr.E02758.1
OsCIPK15	Os11g0113700	AtCIPK16	At2g25090	PtCIPK16	Potri.013G155600.1	EgrSnRK3.19	Eucgr.F00453.1
OsCIPK16	Os09g0418000	AtCIPK17	At1g48260	PtCIPK17/18	Potri.011G067600.1	EgrSnRK3.20	Eucgr.H00223.1
OsCIPK17	Os05g0136200	AtCIPK18	At1g29230	PtCIPK19	Potri.004G058300.1	EgrSnRK3.21	Eucgr.H03182.1
OsCIPK18	Os05g0332300	AtCIPK19	At5g45810	PtCIPK20	Potri.018G019900.1	EgrSnRK3.22	Eucgr.J00641.1
OsCIPK19	Os05g0514200	AtCIPK20	At5g45820	PtCIPK21	Potri.016G133900.1	EgrSnRK3.23	Eucgr.J01840.1
OsCIPK20	Os05g0208100	AtCIPK21	At5g57630	PtCIPK22	Potri.016G133500.1	EgrSnRK3.24	Eucgr.J03116.1
OsCIPK21-1	Os07g0637000	AtCIPK22	At2g38490	PtCIPK23	Potri.003G181900.1
OsCIPK21-2	Os02g0178000	AtCIPK23	At1g30270	PtCIPK24	Potri.006G062800.1
OsCIPK22	Os05g0334750	AtCIPK24	At5g35410	PtCIPK25	Potri.018G122300.1
OsCIPK23	Os07g0150700	AtCIPK25	At5g25110	PtCIPK26	Potri.018G130500.1
OsCIPK24	Os06g0606000	AtCIPK26	At5g21326	PtCIPK27	Potri.006G068400
OsCIPK25	Os06g0543400			PtCIPK28	Potri.002G109000.3
OsCIPK26	Os02g0161000			PtCIPK29	Potri.006G171400.3
OsCIPK27	Os09g0418500			PtCIPK30	Potri.018G109100.1
OsCIPK28	Os05g0476350			PtCIPK31	Potri.018G119200.1
OsCIPK29	Os07g0678300			PtCIPK32	Potri.019G048800.1
OsCIPK30	Os01g0759200			PtCIPK33	Potri.T093800.1
OsCIPK31	Os03g0319400
OsCIPK32	Os12g0132200
OsCIPK33	Os11g0134232

## Sheet: Table S4
Table S4. Detailed information for the 20 motifs in the SnRK proteins in Casuarina equisetifolia.
Motif	Length	Best possible match	function
1	27	YDGAKADIWSCGVILYVLLAGYLPFED	Protein kinase domain
2	29	RRYFQQLISAVDYCHSRGVYHRDLKPENL	Protein kinase domain
3	36	SPEARRLJSRILDPNPATRITIPEIKZHPWFKKGLP	NO
4	21	DGLLHTTCGTPAYVAPEVLSR	Protein kinase domain
5	29	HPNIVRLYEVLATKTKIYIVMEYVKGGEL	ATP binding site
6	41	GKYELGRLLGEGTFAKVYLARNVETGESVAIKVJDKEKVJK	NO
7	21	SNLMKMYRKIYKAEYKCPDWF	NO
8	21	LLDEAGNLKVSDFGLSALSEQ	Protein kinase domain
9	29	IAAEIFEVAPSLHVVEVKKSAGDTLEYHK	NO
10	28	KRETRFTSKKPASVIISKJEEVAKRLGF	NAF domain
11	11	NAFDJISLSSG	NAF domain
12	15	GMMEQIKREISVMRL	NO
13	11	VAKGRLKEDEA	NO
14	19	LKKDLRPALKDIVWTWQGE	NO
15	21	VKKKBYKVKLEGSKAGRKGHL	NO
16	50	CWKKIGHYNMKCRWVRPPRHEGMMTNPVHNNHYFGDEATIIENDGVINTP	NO
17	33	MGYQREDPDQPSQSVEEIMKIIQEARVPAEGSK	NO
18	50	TMECGFNRMHQNEAAVSPVGNRLPGFMEYQGTGIRPQFPVERKWALGLQQ	NO
19	8	FDLSGLFE	NO
20	41	NVVKFELQLYKTREDKYLLDLQRVNGPQILFLDLCAAFLAQ	KA1domain

## Sheet: Table S5
Table S5. The secondary structure of SnRK gene family protein sequence in Casuarina equisetifolia.
Name	Amino acid number/proportion
	Alpha helix	Extended strand	Beta turn	Random coil
CeqSnRK1.1	160/31.31%	95/18.59%	35/6.85%	221/43.25%
CeqSnRK1.2	171/32.63%	91/17.37%	33/6.30%	229/43.70%
CeqSnRK2.1	101/32.48%	55/17.68%	16/5.14%	139/44.69%
CeqSnRK2.2	96/34.78%	43/15.58%	13/4.71%	124/44.93%
CeqSnRK2.3	125/36.76%	52/15.29%	21/6.18%	142/41.76%
CeqSnRK2.4	93/37.65%	30/12.15%	6/2.43%	118/47.77%
CeqSnRK2.5	145/43.94%	37/11.21%	11/3.33%	137/41.52%
CeqSnRK2.6	135/39.71%	54/15.88%	23/6.76%	128/37.65%
CeqSnRK2.7	90/34.48%	32/12.26%	7/2.68%	132/50.57%
CeqSnRK3.1	174/40.09%	74/17.05%	37/8.53%	149/34.33%
CeqSnRK3.2	135/35.53%	64/16.84%	36/9.47%	145/38.16%
CeqSnRK3.3	175/40.79%	67/15.62%	43/10.02%	144/33.57%
CeqSnRK3.4	163/36.63%	79/17.75%	41/9.21%	162/36.40%
CeqSnRK3.5	150/34.32%	86/19.68%	40/9.15%	161/36.84%
CeqSnRK3.6	164/33.81%	81/16.70%	43/8.87%	197/40.62%
CeqSnRK3.7	224/41.40%	97/17.93%	46/8.50%	174/32.16%
CeqSnRK3.8	162/35.76%	81/17.88%	46/10.15%	164/36.20%
CeqSnRK3.9	166/38.34%	76/17.55%	40/9.24%	151/34.87%
CeqSnRK3.10	166/36.89%	80/17.78%	46/10.22%	158/35.11%
CeqSnRK3.11	169/37.06%	84/18.42%	41/8.99%	162/35.53%
CeqSnRK3.12	190/37.18%	90/17.61%	50/9.78%	181/35.42%
CeqSnRK3.13	118/33.15%	64/17.98%	39/10.96%	135/37.92%
CeqSnRK3.14	174/37.50%	76/16.38%	50/10.78%	164/35.34%
CeqSnRK3.15	177/40.23%	64/14.55%	45/10.23%	154/35.00%
CeqSnRK3.16	156/36.62%	79/18.54%	38/8.92%	153/35.92%
CeqSnRK3.17	151/35.20%	78/18.18%	46/10.72%	154/35.90%

## Sheet: Table S6
Table S6. Ka/Ks ratios of gene pairs in Casuarina equisetifolia.
Orthologous pairs	Ka（JC）	Ks（JC）	Ka/Ks
CeqSnRK2.6/PtSnRK2.3	0.0728842	0.924299	0.0788535
CeqSnRK2.7/PtSnRK2.1	0.0787321	1.27314	0.0618411
CeqSnRK3.8/PtSnRK3.14	0.177419	1.29413	0.137095
CeqSnRK3.12/PtSnRK3.12	0.119845	1.12296	0.106722
CeqSnRK3.13/PtSnRK3.26	0.0880605	0.791132	0.111309
CeqSnRK3.14/PtSnRK3.19	0.110198	1.20761	0.0912531
CeqSnRK3.15/PtSnRK3.20	0.250848	2.06496	0.121478
CeqSnRK3.16/PtSnRK3.2	0.0991168	0.983839	0.100745
CeqSnRK3.17/PtSnRK3.18	0.103575	0.848902	0.12201
CeqSnRK3.11/PtSnRK3.6	0.0759617	1.11189	0.0683173
CeqSnRK3.11/PtSnRK3.25	0.0782327	1.30064	0.0601493
CeqSnRK3.11/PtSnRK3.24	0.0782327	1.26536	0.0618265
CeqSnRK2.1/EgrSnRK2.7	0.0838618	1.43238	0.058547
CeqSnRK2.6/EgrSnRK2.1	0.0749696	1.17866	0.0636056
CeqSnRK3.1/EgrSnRK3.8	0.217759	1.15593	0.188383
CeqSnRK3.4/EgrSnRK3.24	0.135522	2.0277	0.0668354
CeqSnRK3.5/EgrSnRK3.20	0.23647	1.37212	0.172339
CeqSnRK3.6/EgrSnRK3.16	0.1175	1.62978	0.0720956
CeqSnRK3.7/EgrSnRK3.22	0.0772333	1.26695	0.0609601
CeqSnRK3.9/EgrSnRK3.10	0.0882679	1.30858	0.067453
CeqSnRK3.11/EgrSnRK3.15	0.0868253	1.37875	0.062974
CeqSnRK3.12/EgrSnRK3.7	0.128386	1.06084	0.121023
CeqSnRK3.15/EgrSnRK3.3	0.247357	1.05022	0.235529
CeqSnRK3.16/EgrSnRK3.19	0.0785599	1.26384	0.0621599
CeqSnRK3.17/EgrSnRK3.17	0.0951492	1.0948	0.0869104
CeqSnRK1.1/AtSnRK1.2	0.132215	1.5548	0.0850365
CeqSnRK1.1/AtSnRK1.1	0.093715	1.57602	0.0594629
CeqSnRK1.2/AtSnRK1.2	0.126651	1.47685	0.0857576
CeqSnRK1.2/AtSnRK1.1	0.1092	1.40715	0.0776036
CeqSnRK3.7/AtCIPK3	0.105383	1.9206	0.0548699
CeqSnRK3.13/AtCIPK24	0.145622	1.9567	0.0744227
CeqSnRK3.15/AtCIPK14	0.256463	1.38636	0.18499
CeqSnRK3.17/AtCIPK9	0.139797	1.71114	0.0816981
CeqSnRK2.5/AtSnRK2.5	0.125855	2.41082	0.0522041
CeqSnRK2.5/AtSnRK2.1	0.128881	1.70213	0.0757173
CeqSnRK2.5/AtSnRK2.9	0.179058	1.93977	0.0923092
CeqSnRK3.11/OsCIPK23	0.129556	2.85992	0.0453006
CeqSnRK3.13/OsCIPK24	0.159333	3.20525	0.04971
CeqSnRK3.16/OsCIPK8	0.17097	1.67021	0.102365
CeqSnRK3.17/OsCIPK9	0.208037	2.09685	0.0992138
CeqSnRK3.16/OsCIPK24	0.25971	2.17707	0.119293
CeqSnRK3.13/OsCIPK8	0.239193	2.42517	0.0986293
CeqSnRK3.10/OsCIPK16	0.318165	1.16481	0.273147
Paralogous pairs	Ka（JC）	Ks（JC）	Ka/Ks
CeqSnRK1.1/CeqSnRK1.2	0.0135482	0.039087	0.346617
CeqSnRK2.1/CeqSnRK2.4	0.187066	1.67921	0.111401
CeqSnRK2.2/CeqSnRK2.5	0.117612	1.2214	0.096293
CeqSnRK2.3/CeqSnRK2.7	0.108221	2.28894	0.0472799
CeqSnRK3.1/CeqSnRK3.15	0.29945	1.24053	0.241388
CeqSnRK3.2/CeqSnRK3.3	0.277184	0.368857	0.751467
CeqSnRK3.4/CeqSnRK3.10	0.191797	2.98455	0.0642632
CeqSnRK3.13/CeqSnRK3.16	0.229106	1.75979	0.130189

## Sheet: Table S7
Table S7. Promoter analysis of the CeqSnRK genes family.
Element	Function							Gene name
		SnRK1.1	SnRK1.2	SnRK2.1	SnRK2.2	SnRK2.3	SnRK2.4	SnRK2.5	SnRK2.6	SnRK2.7	SnRK3.1	SnRK3.2	SnRK3.3	SnRK3.4	SnRK3.5	SnRK3.6	SnRK3.7	SnRK3.8	SnRK3.9	SnRK3.10	SnRK3.11	SnRK3.12	SnRK3.13	SnRK3.14	SnRK3.15	SnRK3.16	SnRK3.17
AE-box	part of a module for light response	1	2			1	1				1		1				2	1				1
G-Box	cis-acting regulatory element involved in light responsiveness			1	1	3		1	3	2			1	1	1	1	2		3	1		2	1	2	3	1
G-box	cis-acting regulatory element involved in light responsiveness	7		6	7	4	1	2	7	5	6	2	1	1	8	6	1	2	4		1	3		2	7	1	1
GT1-motif	light responsive element	1	1	2	1	1	1	1	2	1	2			1	2	1					1				3		1
I-box	part of a light responsive element					1			1			2					1					1			1		1
LAMP-element	part of a light responsive element																		1
TCT-motif	part of a light responsive element	1	1	2	2	1			2	2	5		1	1		2				1	2			2	3	1
ACE	cis-acting element involved in light responsiveness	2								1						1	1		1					1		1
GA-motif	part of a light responsive element						1	1			1		1												1
GATA-motif	part of a light responsive element		1	1		2		1				1	1									1	1	1	2		2
Sp1	light responsive element								1		1					1		2	2				1
TCCC-motif	part of a light responsive element	1			1	1		2		1							1	1		1		1
AT1-motif	part of a light responsive module								1
chs-CMA1a	part of a light responsive element																	1							1
chs-CMA2a	part of a light responsive element																						2
chs-CMA2b	part of a light responsive element					1
Gap-box	part of a light responsive element					1							1									1
MRE	MYB binding site involved in light responsiveness			1						1	3	2		2		1					2	1		1	2	1	1
ATC-motif	part of a conserved DNA module involved in light responsiveness											1	1												1
Box 4	part of a conserved DNA module involved in light responsiveness	3	1	1	3	2		1	5	1	9		3	2	1	3	1			1	2	1	3			4
ATCT-motif	part of a conserved DNA module involved in light responsiveness										1				1	1			1				1		1
AAAC-motif	light responsive element							1									1
sbp-CMA1c	part of a light responsive element			1
CAG-motif	part of a light response element	1																									1
GATT-motif	part of a light responsive element	1
Box II	part of a light responsive element									1					1				1
P-box	gibberellin-responsive element				1							2		1			1						1	3		1
TATC-box	cis-acting element involved in gibberellin-responsiveness							1				1					1			1		1		1	2		1
GARE-motif	gibberellin-responsive element							1		1	2		1				1								1	1
CGTCA-motif	cis-acting regulatory element involved in the MeJA-responsiveness	3	1	1	4	6	5	2	2	3	3	1	2	3	5		2	3	6	2		1	1	2	1		2
TGACG-motif	cis-acting regulatory element involved in the MeJA-responsiveness	3	1	1	4	6	5	2	2	3	3	1	2	3	5		2	3	6	2		1	1	2	1		2
TCA-element	cis-acting element involved in salicylic acid responsiveness	1	1		1	1		1	1		1	2	2	1		2		1				1				1
AuxRE	part of an auxin-responsive element																	1
AuxRR-core	cis-acting regulatory element involved in auxin responsiveness													1
TGA-element	auxin-responsive element	1				1		2			3				2		1	1						1	1
ABRE	cis-acting element involved in the abscisic acid responsiveness	5		4	7	8	1	4	9	5	6	3	1	2	8	3	2	1	8	2	1	5		4	7	1	1
LTR	cis-acting element involved in low-temperature responsiveness	2		2	1	1	2	1	1		1	1	1		1		1		2		1	1				1	2
MBS	MYB binding site involved in drought-inducibility		1		1		2	2		1	1	1	1	2		1	1			3		2	2		1		1
WUN-motif	wound-responsive element
TC-rich repeats	cis-acting element involved in defense and stress responsiveness	1		2		1			1			1		1	1		1							1
circadian	cis-acting regulatory element involved in circadian control					1	1					1	1				1				1					1
HD-Zip 1	element involved in differentiation of the palisade mesophyll cells													2					1	1				1			1
CAT-box	cis-acting regulatory element related to meristem expression			1						2					1		2	2			3		1	2		1	1
O2-site	cis-acting regulatory element involved in zein metabolism regulation	1	1			1			1	1		1		1	1		2	1	1	1				1	2	1
ARE	cis-acting regulatory element essential for the anaerobic induction	7	6	3	3	2			4	1		1	1	3	3	1	3	4	3	2	2	2	3	1	1	1	3
GC-motif	enhancer-like element involved in anoxic specific inducibility	1	1	1			1	1		1					1				1	1
motif I	cis-acting regulatory element root specific										1
RY-element	cis-acting regulatory element involved in seed-specific regulation			1													1
AACA_motif	involved in endosperm-specific negative expression		1
GCN4_motif	cis-regulatory element involved in endosperm expression			1							1						1		1							1
MSA-like	cis-acting element involved in cell cycle regulation						1	1
MBSI	MYB binding site involved in flavonoid biosynthetic genes regulation										1
HD-Zip 3	protein binding site															1
Box III	protein binding site		1
CCAAT-box	MYBHv1 binding site				1		1	1	2	2				1					1						1		1
AT-rich element	binding site of AT-rich DNA binding protein (ATBP-1)								1															1
3-AF3 binding site	part of a conserved DNA module array (CMA3)		1
CAAT-box	common cis-acting element in promoter and enhancer regions	32	46	21	35	34	40	29	36	34	35	32	40	40	51	50	32	42	21	45	24	39	42	38	34	35	38
TATA-box	core promoter element around -30 of transcription start	24	31	29	38	46	6	22	38	50	33	29	12	34	21	40	10	21	31	39	42	55	22	15	44	46	37
A-box	cis-acting regulatory element	1		2	1	3			1	1	2					2	1									1
MYC		4	2	4	5	3	4	2	7	6	5	10	2	4	3	5	4	5	2	2		6	6	6	3	2	5
MYB		6	5	3		5	5	3	2	4	9	5	4	2	3	4	4	4	2	3	5	3	5	2	4	1	3
ABRE2															1										1
ABRE3a		2				1		1	2	2	1	1		1	1						1	1
ABRE4		2			1	1		1	2	2	1	1		1	1						1	1
AT~ABRE		1
AAGAA-motif		6	3		1	6	1	1		1	1	4		4	2	1	4	1			3		2	1	4		1
AT~TATA-box		3	3	2	3	4		2	2	14	1	2		4	1			1	4		1	2	1		2	13	3
CCGTCC-box		1		2	1	3			1	1	2					2	1									1
STRE		3	2		3	4	1	7	1	1		1	2	1			2	3		3	4	1	1	1	2	4	2
as-1		3	1	1	4	6	5	2	2	3	3	1	2	3	5		2	3	6	2		1	1	2	1		2
Myb-binding site		1	1			2	1	1		1	3		2	1	1	1	1		1	1			2	1	1	1	2
MYB-like sequence		2	1	1		2	2		2	2	1	3			1	1	1	1	1		2	1	2
CCGTCC-motif		1		2	1	3				1	2					2	1									1
W box		1					1	1	2			2	3		3			1	1	3	2	1	1		1		2
Myb		1	3		1	1	3	4		1	1	2	1	2	2	1	2		1	2		2	2		1		5
WRE3			2			1		1			1		1		1					1		2				1	1
CTAG-motif			1
Myc			1			1	1			1	1		2	1						1				1		1
AC-I				1																	2
AC-II					2
WUN-motif					2				4	2			1	1			1							1	1	1
ERE					2	2			2		3	1	2		2	2			1	1		1		1	1	1
MYB recognition site					1		1	1	2	2				1					1						1		1
DRE core						1			1					1		2	1		1
E2Fb							1	1								1			1
CARE								1
box S									1													1					1
TATA									2		3			1		2		1		2	2	4	1	2	3		1
TCA									1								1	2		1			2
DRE1										1													1				2
AP-1											1
F-box														1		1
H-box																						1

## Sheet: Table S8
Table S8. List of primer sequences used for qRT-PCR analysis of genes.
No.	Name	Orientation	Primer Sequence (5'->3')
1	CeqSnRK1.1	F	CTGTGCCTCCACCAGATACAATGC
		R	GTCAAATCCCCTCTTCACCACTTCC
2	CeqSnRK1.2	F	TCCGTCCTTCTAGTGGCTATCTTGG
		R	GTCTGATGCCCGTTCCTTGATACTC
3	CeqSnRK2.1	F	ATGAGGGATAAGCAGACGGAGGAG
		R	TGTTGGGATGCCTTAATGACCTGTG
4	CeqSnRK2.2	F	AACTTGCCGAGGGAACTAACAGAAG
		R	CGTGAAGATGGAGGAGGAACTTTGG
5	CeqSnRK2.3	F	ACACCAGCTTATATTGCACCAGAGG
		R	GCTCCGACCAACATCACATACAGG
6	CeqSnRK2.4	F	AGTCTTCAGTGCTTCATTCCCAACC
		R	ACCACACATCTGCAATCTTCCCATC
7	CeqSnRK2.5	F	GGCAAGAAACCCACCTCCATCATC
		R	CATCCTCTTCCTCCTCCACCTCTG
8	CeqSnRK2.6	F	GAAGGATCTAATGCTGGCGGACAAG
		R	GCATCAGCTTCGGATAGGACATCAG
9	CeqSnRK2.7	F	AGGCAGCATGGATCTTGATGACTTG
		R	GCGGGCAGACATAATCACCACTC
10	CeqSnRK3.1	F	TGTGGTCTTGCGGCATCATTCTG
		R	CGGTACTCGCCCTTGTAAATCTTCC
11	CeqSnRK3.2	F	CCTGCCTCAGTCATCATCTCTAAGC
		R	AGCCTTCTGTCCCTCCGTCTTC
12	CeqSnRK3.3	F	CCGCTTATGTTGCTCCTGAAGTC
		R	ACAGAACCACACCACAAGACCAA
13	CeqSnRK3.4	F	GGAAAACGGACGGTCGGAAAGG
		R	AACTCCACCACCACCACCTCTG
14	CeqSnRK3.5	F	CACCGCCGAGAATACCAGTTTCC
		R	AGACTTCCTGTACCACGCATGTTG
15	CeqSnRK3.6	F	CCCGTCTTCTCACTCGTGTTCTTG
		R	TGAACCACTTGCTCTCCATGATGTC
16	CeqSnRK3.7	F	GGCGGATGCGAGAAGATGAAGC
		R	CTGTGATAAACACCCCTGCTATGGC
17	CeqSnRK3.8	F	AGAAAGCAGCGGGAGACACAATG
		R	GTTCACCTCCTTGCCAAGTCCATAC
18	CeqSnRK3.9	F	GCGTGAAGAAGAGCGAGTCCATG
		R	AGAACTCCGCCGCAATCAATAGC
19	CeqSnRK3.10	F	GACCTGACGAGCCTGTTTGAGAAC
		R	CTGCCTTTCCCACTTCATAGCGTAG
20	CeqSnRK3.11	F	GGCTCCTTCGCTCTACATGGTTG
		R	CTGCTTCATCTCCTGTTCTCCAGAC
21	CeqSnRK3.12	F	GGAAGTCCGAACTATGTTGCTCCTG
		R	GATGACGCCACACGACCAGATG
22	CeqSnRK3.13	F	AGACTAGGCTTGAGGGAGTATCTGC
		R	AAGGGATGGAGCAACTTCAAAGACC
23	CeqSnRK3.14	F	CAAGCGGAGACACACTGGAATACC
		R	CAACCTGCGGTGGAAGAGTATGG
24	CeqSnRK3.15	F	GTGGTTTCGGAAGGGTTACAAGGAG
		R	CGGAGTCGCAGCAGTCTTTCAG
25	CeqSnRK3.16	F	GAAGGACGATTGGCGAGGGAAC
		R	GGACTTTCATAGCGACACTCTCACC
26	CeqSnRK3.17	F	TCACAGAAAGTACGGGAGGATGGG
		R	AGCCAGAAGCACAAAGAGAATGACC
27	CeqEF1α	F	TGGCATGTACTTGAGGATCACA
		R	TGCATTGATGGCACGAAGC
